# Supplementary material for: Heteroatom-doped C3N as a promising metal-free catalyst for a high-efficiency carbon dioxide reduction reaction
Source: Royal Society of Chemistry journal article supplement (doi:10.1039/d0nj02318c), 2020-01-01
Supplement: d0nj02318c1.pdf [file d0nj02318c1.pdf]

# Heteroatom–Doped C<sub>3</sub>N as a Promising Metal–Free Catalyst for High–Efficiency Carbon Dioxide Reduction Reaction

*Tingting Zhao,<sup>a</sup> Yu Tian<sup>b</sup> Likai Yan\*,<sup>a</sup> and Zhongmin Su<sup>a</sup>*

[a] Institute of Functional Materials Chemistry and Local United Engineering Lab for Power Battery, Faculty of Chemistry, Northeast Normal University, Changchun, 130024, China.

[b] Institute for Interdisciplinary Quantum Information Technology, Jilin Engineering Normal University, Changchun, 130052, China.

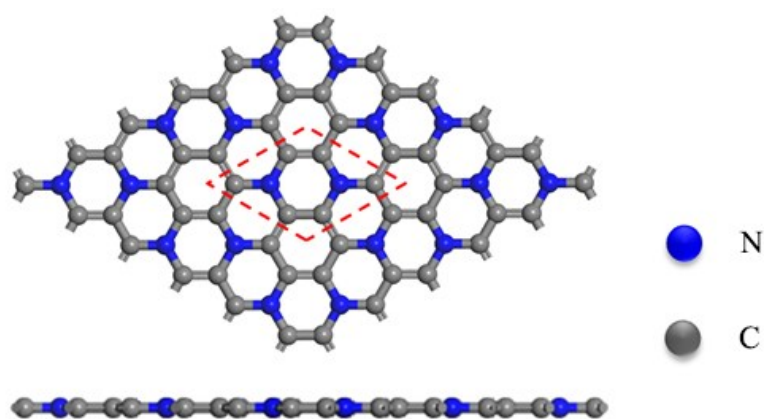

**Fig. S1** Top and side views of the  $C_3N$ .

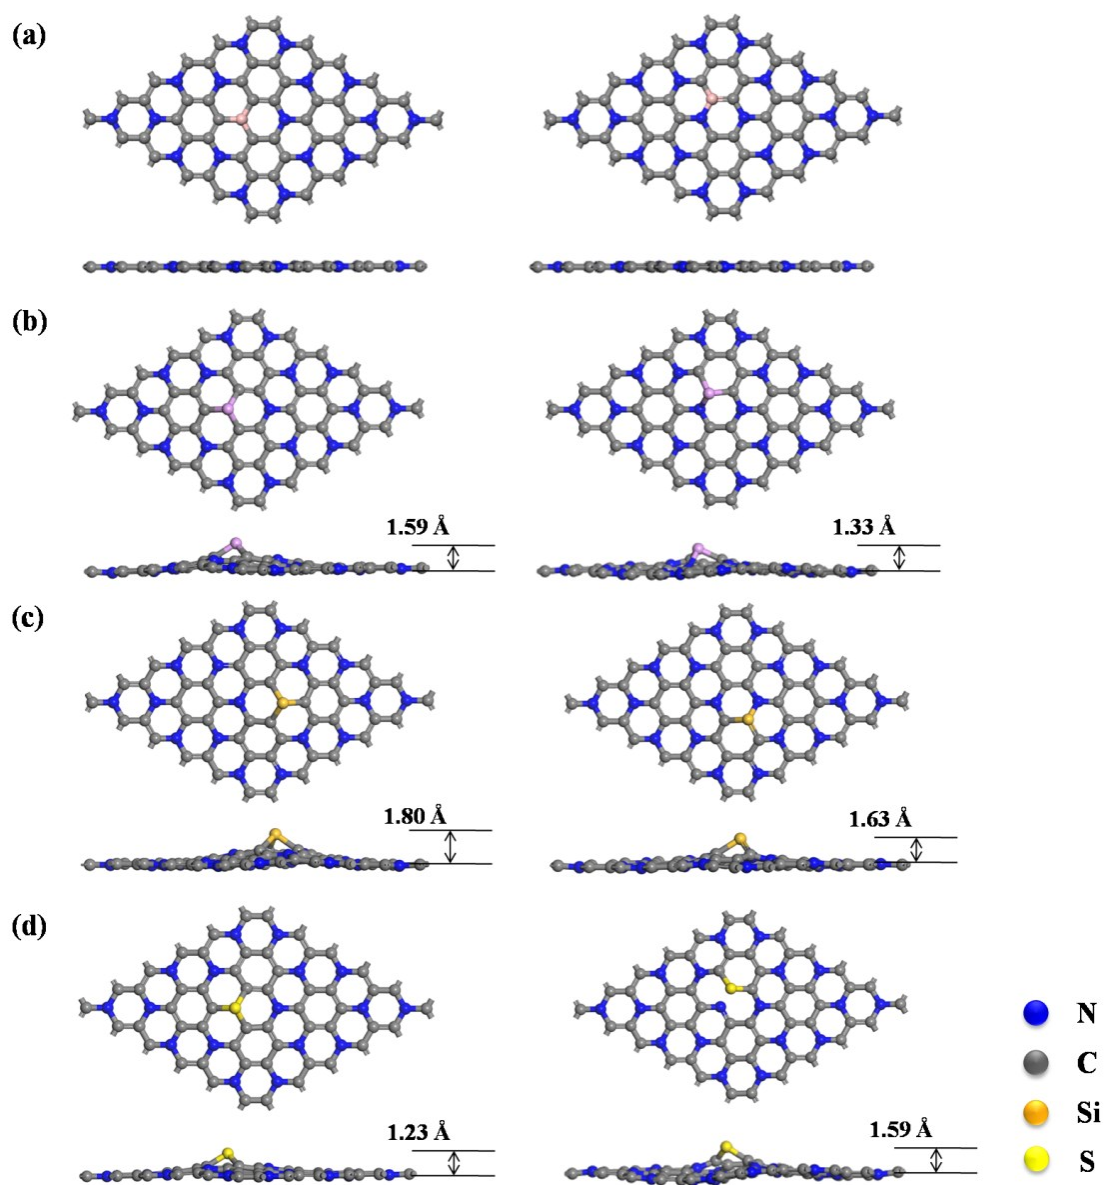

**Fig. S2** Top and side views of B (a), P (b), Si (c), S (d)-doped  $C_3N$ , and the corresponding formation energies.

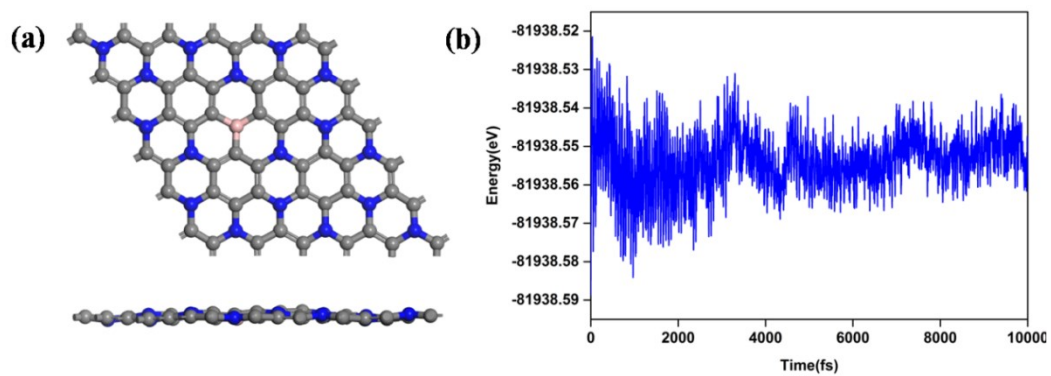

**Fig. S3** Geometry snapshot (a) and variations of energy (b) against time for MD simulations of B<sub>N</sub>-doped C<sub>3</sub>N, and the simulation is run at 500 K for 10 ps with a time step of 1 fs.

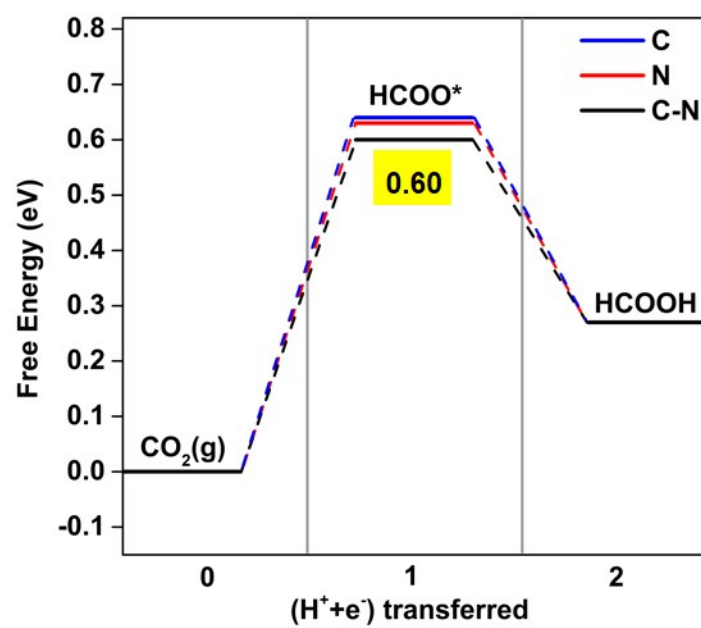

**Fig. S4** The free energy diagram for CO<sub>2</sub>ER on C<sub>3</sub>N.

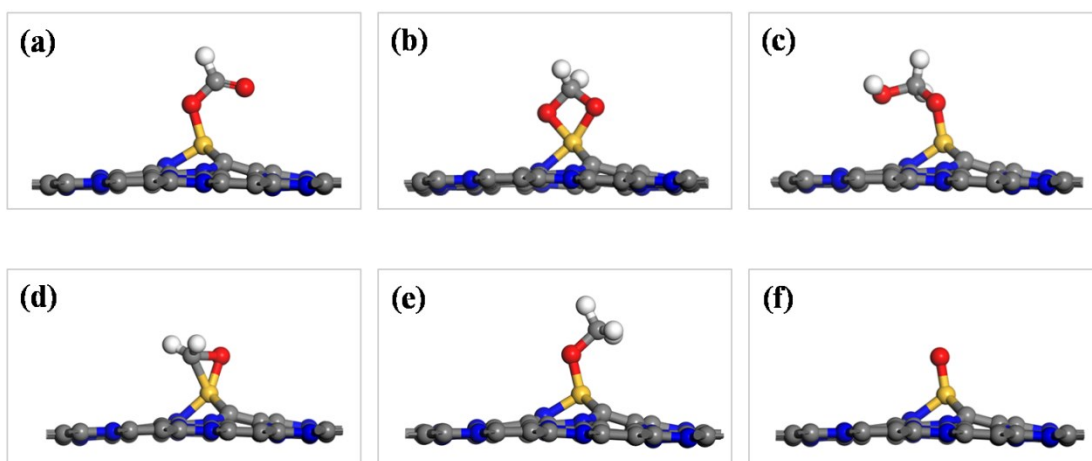

**Fig. S5** The optimized geometric structures of  $\text{HCOO}^*$  (a),  $\text{H}_2\text{COO}^*$  (b),  $\text{H}_2\text{COOH}^*$  (c),  $\text{H}_2\text{CO}^*$  (d),  $\text{H}_3\text{CO}^*$  (e), and  $\text{O}^*$  (d), along the most favorable reaction path of  $\text{CO}_2\text{ER}$  proceeded on  $\text{Si}_\text{C}$ -doped  $\text{C}_3\text{N}$ .

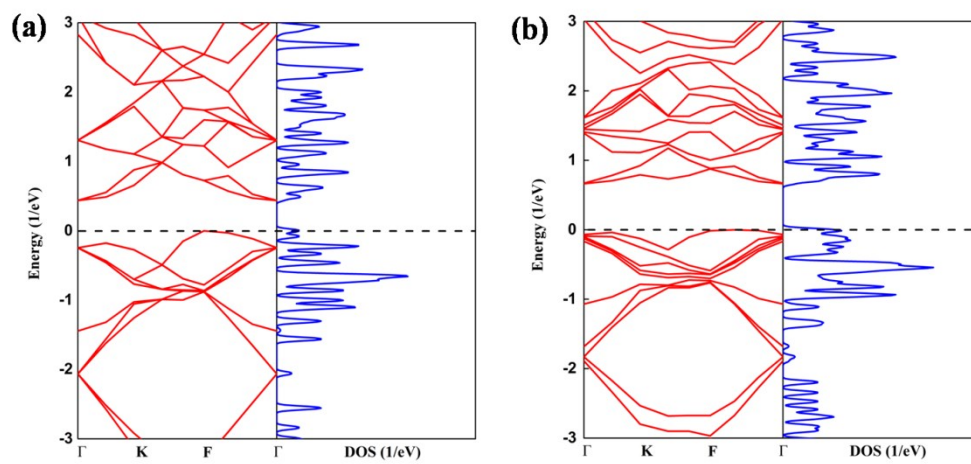

**Fig. S6** Band structures and DOS for  $C_3N$  (a) and  $B_N$ -doped  $C_3N$  (b).
